# Supplementary material
Source: Springer Nature journal article supplement (https://www.springermedizin.de/resource/supplementary/12950_2005_46_MOESM2_ESM.pdf/9557890)

**A**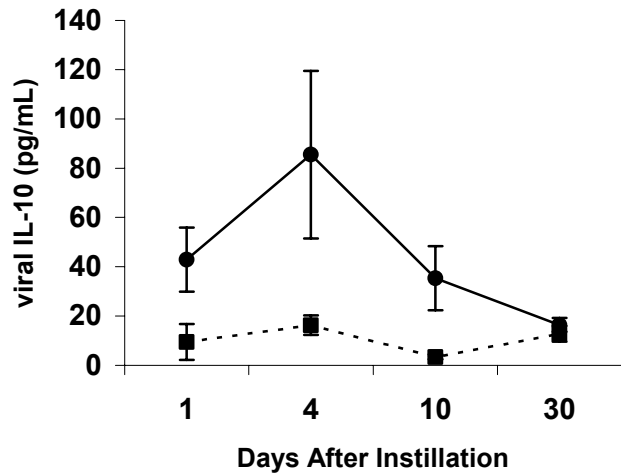**B**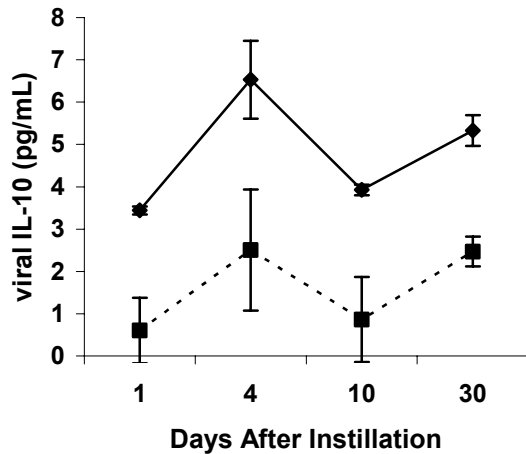

Supplement: MOESM2 [file 9557890]
